# Supplementary material for: Hsa_circ_0063526 promotes the development of endometriosis by sponging miRNA-141-5p
Source: Research Square preprint supplement (doi:10.21203/rs.3.rs-249032/v1), 2021-03-01
Supplement: Supplementary file 1 [file c73d4ea2c107f995b276cc0b.docx]

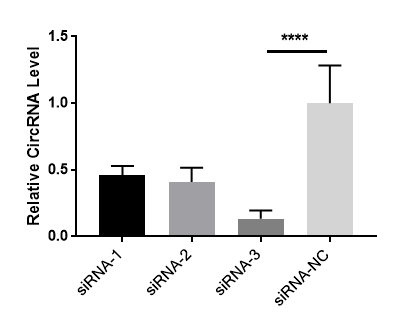
Figure S1： Relative expression level of hsa_circ0063526 in End1/E6E7 cells after siRNA transfection. Replicated 3 times involving 3 samples (**** P<0.001).
